# Supplementary material for: Absorption, Metabolism and Excretion of Cranberry (Poly)phenols in Humans: A Dose Response Study and Assessment of Inter-Individual Variability
Source: PubMed Central journal article supplement (PMC5372931; doi:10.3390/nu9030268), 2017-03-11

**Supplementary Table 1.** Kinetic parameters after 409, 787 and 1238 mg total (poly)phenols intervention after ingestion of cranberry juice.

|                                                          | 409 mg          |            |                   | 787 mg          |            |                   | 1238 mg        |            |                  |
|----------------------------------------------------------|-----------------|------------|-------------------|-----------------|------------|-------------------|----------------|------------|------------------|
|                                                          | Cmax (nM)       | Tmax (h)   | AUC (nM*h)        | Cmax (nM)       | Tmax (h)   | AUC (nM*h)        | Cmax (nM)      | Tmax (h)   | AUC (nM*h)       |
| (4R)-5-(3',4'-Dihydroxyphenyl)-gamma-valerolactone-4'-O- |                 |            |                   |                 |            |                   |                |            |                  |
| sulfate                                                  | 189 ± 80        | 4.3 ± 0.8  | 1577 ± 595        | 306 ± 60        | 3.1 ± 0.6  | 2582 ± 447        | 303 ± 53       | 6.7 ± 2.3  | 3398 ± 674       |
| 1-Methylpyrogallol-O-sulfate                             | 409 ± 119       | 8.8 ± 3.8  | 4676 ± 1150       | 538 ± 172       | 6.4 ± 3.3  | 5613 ± 1395       | 391 ± 114      | 6.3 ± 3.3  | 5279 ± 1404      |
| 2,3-dihydroxybenzoic acid                                | 7906 ± 2299     | 3.2 ± 0.8  | 140816 ± 38319    | 12024 ± 4055    | 2.0 ± 0.6  | 185530 ± 55774    | 3443           | 1.4 ± 0.3  | 175525 ± 63378   |
| 2,4-dihydroxybenzoic acid                                | 18 ± 4          | 6.4 ± 3.3  | 250 ± 63          | 22 ± 4          | 3.9 ± 2.5  | 280 ± 54          | 25 ± 4         | 1.4 ± 0.3  | 299 ± 57         |
| 2,5-dihydroxybenzoic acid                                | 419 ± 146       | 5.4 ± 1.0  | 6685 ± 2608       | 425 ± 137       | 7.3 ± 2.3  | 5888 ± 1937       | 772 ± 241      | 4.3 ± 1.1  | 11636 ± 3929     |
| 2-hydroxybenzoic acid                                    | 658 ± 459       | 10.9 ± 3.4 | 8469 ± 5903       | 308 ± 128       | 5.3 ± 2.5  | 4857 ± 2261       | 443 ± 281      | 1.8 ± 0.5  | 6160 ± 3852      |
| 2-hydroxyhippuric acid                                   | 9 ± 3           | 5.6 ± 0.6  | 90 ± 33           | 7 ± 2           | 4.4 ± 0.3  | 89 ± 28           | 10 ± 3         | 4.9 ± 0.6  | 118 ± 39         |
| 2-Methylpyrogallol-O-sulfate                             | 224 ± 81        | 18.4 ± 2.8 | 3095 ± 947        | 185 ± 44        | 21.8 ± 2.2 | 2821 ± 596        | 304 ± 134      | 18.0 ± 3.1 | 5145 ± 2560      |
| 3-(4-hydroxy-3-methoxyphenyl) propionic acid             | 280 ± 143       | 7.2 ± 3.3  | 3242 ± 1789       | 304 ± 122       | 13.8 ± 4.0 | 3241 ± 1294       | 212 ± 105      | 8.7 ± 3.9  | 2430 ± 1259      |
| 3-(4-hydroxyphenyl) propionic acid                       | 312629 ± 174539 | 10.0 ± 2.8 | 3119972 ± 1428714 | 263152 ± 102592 | 7.6 ± 3.3  | 2774346 ± 1092234 | 115012 ± 39679 | 9.0 ± 3.0  | 1609708 ± 612310 |
| 3,4-dihydroxybenzaldehyde                                | 32 ± 10         | 5.1 ± 2.5  | 566 ± 172         | 34 ± 10         | 1.8 ± 0.8  | 618 ± 191         | 31 ± 7         | 1.0 ± 0.0  | 567 ± 153        |
| 3,4-dihydroxyphenyl acetic acid                          | 302 ± 88        | 8.6 ± 3.0  | 4802 ± 1490       | 476 ± 138       | 6.1 ± 2.4  | 6348 ± 2188       | 582 ± 198      | 6.0 ± 2.4  | 7443 ± 2431      |
| 3-hydroxybenzoic acid                                    | 68 ± 22         | 0.2 ± 0.2  | 1187 ± 412        | 66 ± 23         | 0.7 ± 0.3  | 1114 ± 374        | 86 ± 35        | 4.3 ± 2.5  | 1035 ± 305       |
| 3-hydroxyhippuric acid                                   | 41 ± 7          | 0.3 ± 0.2  | 685 ± 93          | 45 ± 7          | 0.1 ± 0.1  | 718 ± 128         | 42 ± 6         | 0.2 ± 0.1  | 698 ± 94         |
| 3-hydroxyphenyl acetic acid                              | 689 ± 246       | 7.6 ± 2.2  | 9780 ± 4195       | 615 ± 360       | 10.9 ± 3.4 | 9293 ± 5484       | 460 ± 115      | 9.8 ± 2.8  | 7483 ± 2018      |
| 4-hydroxybenzaldehyde                                    | 85 ± 27         | 6.1 ± 2.4  | 1073 ± 213        | 77 ± 18         | 9.9 ± 3.6  | 1204 ± 359        | 107 ± 27       | 5.4 ± 2.5  | 1270 ± 328       |
| 4-hydroxybenzoic acid                                    | 45 ± 12         | 7.7 ± 2.2  | 674 ± 175         | 42 ± 7          | 5.6 ± 0.9  | 605 ± 101         | 61 ± 18        | 7.1 ± 0.6  | 753 ± 198        |
| 4-hydroxyhippuric acid                                   | 658 ± 334       | 0.0 ± 0.0  | 8670 ± 3778       | 592 ± 157       | 0.3 ± 0.2  | 6111 ± 1439       | 898 ± 318      | 0.7 ± 0.5  | 9169 ± 2315      |

|                                                      |               |            |                |              |            |                |               |            |                  |
|------------------------------------------------------|---------------|------------|----------------|--------------|------------|----------------|---------------|------------|------------------|
| 4-hydroxyphenyl acetic acid                          | 1788 ± 732    | 3.3 ± 0.6  | 34917 ± 16343  | 1849 ± 724   | 2.9 ± 0.4  | 30711 ± 12082  | 2606 ± 1407   | 2.7 ± 0.5  | 39174 ± 18822    |
| 4-Methylcatechol- <i>O</i> -sulfate                  | 3160 ± 945    | 1.2 ± 0.1  | 52247 ± 15794  | 3497 ± 1192  | 1.0 ± 0.0  | 54214 ± 18798  | 2818 ± 753    | 1.0 ± 0.0  | 52455 ± 15564    |
| 4-Methylgallic-3- <i>O</i> -sulfate                  | 334 ± 156     | 9.1 ± 3.8  | 2314 ± 853     | 275 ± 82     | 6.1 ± 3.4  | 2188 ± 592     | 324 ± 92      | 6.4 ± 3.4  | 2440 ± 735       |
| Alfa-hydroxyhippuric acid                            | 2374 ± 527    | 1.0 ± 0.2  | 31185 ± 8361   | 2943 ± 587   | 1.0 ± 0.0  | 34824 ± 8717   | 4617 ± 1277   | 1.2 ± 0.1  | 46140 ± 12881    |
| Benzoic acid                                         | 2749 ± 880    | 7.0 ± 3.3  | 55184 ± 18814  | 2169 ± 608   | 1.9 ± 0.8  | 42207 ± 12182  | 2790 ± 953    | 1.2 ± 0.1  | 52665 ± 17184    |
| Caffeic acid                                         | 1 ± 1         | 16.7 ± 2.9 | 2 ± 1          | 1 ± 1        | 8.6 ± 3.0  | 1 ± 1          | 2 ± 2         | 3.0 ± 1.0  | 2 ± 2            |
| Caffeic Acid 3-β-D-Glucuronide                       | 11 ± 3        | 3.1 ± 0.8  | 68 ± 49        | 16 ± 4       | 3.8 ± 2.5  | 35 ± 10        | 34 ± 5        | 1.3 ± 0.2  | 126 ± 43         |
| Caffeic Acid 4-β-D-Glucuronide                       | 33 ± 6        | 7.9 ± 3.2  | 320 ± 69       | 59 ± 8       | 9.4 ± 3.7  | 380 ± 69       | 86 ± 14       | 7.1 ± 3.3  | 457 ± 79         |
| Catechol- <i>O</i> -sulfate                          | 19277 ± 3200  | 14.0 ± 4.0 | 264834 ± 45226 | 24555 ± 3775 | 6.3 ± 3.3  | 346432 ± 61239 | 17570 ± 2964  | 11.3 ± 4.0 | 258926 ± 45001   |
| Chlorogenic acid                                     | 4 ± 2         | 4.9 ± 0.9  | 37 ± 33        | 5 ± 2        | 6.8 ± 2.3  | 40 ± 35        | 11 ± 5        | 8.3 ± 2.2  | 107 ± 59         |
| Dihydro Caffeic Acid 3- <i>O</i> -Sulfate            | 1643 ± 889    | 4.7 ± 2.5  | 19433 ± 11382  | 1656 ± 1116  | 6.2 ± 2.3  | 15079 ± 10166  | 1229 ± 623    | 4.7 ± 2.5  | 16982 ± 9645     |
| Dihydro Caffeic Acid 3- <i>O</i> -β-D-Glucuronide    | 90 ± 13       | 6.9 ± 0.5  | 1418 ± 206     | 84 ± 11      | 7.1 ± 0.4  | 1291 ± 207     | 99 ± 15       | 6.4 ± 0.6  | 1585 ± 268       |
| Dihydro ferulic acid 4- <i>O</i> -sulfate            | 166 ± 84      | 1.8 ± 0.6  | 2334 ± 1281    | 197 ± 96     | 1.9 ± 0.6  | 2037 ± 950     | 151 ± 49      | 1.1 ± 0.3  | 1897 ± 703       |
| Dihydro Ferulic Acid 4- <i>O</i> -β-D-Glucuronide    | 123 ± 25      | 6.8 ± 2.3  | 1475 ± 302     | 201 ± 59     | 8.7 ± 3.1  | 2061 ± 512     | 230 ± 64      | 6.9 ± 2.4  | 2448 ± 749       |
| Dihydro Isoferulic acid 3- <i>O</i> -β-D-Glucuronide | 44 ± 21       | 7.4 ± 3.3  | 423 ± 158      | 23 ± 10      | 5.3 ± 2.6  | 287 ± 106      | 20 ± 4        | 10.6 ± 3.5 | 269 ± 63         |
| dihydrocaffeic acid                                  | 91 ± 31       | 1.8 ± 0.4  | 1254 ± 346     | 93 ± 32      | 2.1 ± 0.3  | 1451 ± 535     | 91 ± 31       | 2.1 ± 0.3  | 1436 ± 529       |
| DihydroIsoferulic acid 3- <i>O</i> -sulfate          | 90 ± 41       | 2.1 ± 0.8  | 1154 ± 646     | 97 ± 42      | 2.1 ± 0.8  | 859 ± 449      | 83 ± 20       | 1.2 ± 0.1  | 748 ± 243        |
| Ferulic acid 4- <i>O</i> -glucuronide                | 105 ± 13      | 5.9 ± 2.4  | 760 ± 109      | 165 ± 29     | 9.1 ± 3.8  | 1062 ± 181     | 266 ± 39      | 9.0 ± 3.8  | 1394 ± 184       |
| Ferulic Acid 4- <i>O</i> -Sulfate                    | 1209 ± 470    | 4.4 ± 2.5  | 8749 ± 4547    | 2268 ± 794   | 1.2 ± 0.1  | 11484 ± 5522   | 2758 ± 883    | 1.6 ± 0.3  | 13080 ± 5235     |
| Hippuric acid                                        | 54624 ± 15425 | 5.7 ± 2.5  | 230484         | 12282        | 8.1 ± 3.1  | 223886         | 63012 ± 20922 | 4.8 ± 2.4  | 1052242 ± 327861 |
| Homovanillic acid                                    | 491 ± 173     | 16.0 ± 3.2 | 8797 ± 3227    | 511 ± 165    | 22.2 ± 1.8 | 9005 ± 2913    | 797 ± 349     | 19.7 ± 2.9 | 11313 ± 3885     |
| Homovanillic acid sulfate                            | 33 ± 14       | 3.8 ± 2.5  | 512 ± 218      | 30 ± 10      | 1.1 ± 0.2  | 522 ± 178      | 34 ± 10       | 1.2 ± 0.1  | 635 ± 199        |

|                                              |             |           |                |             |            |                |             |            |                |
|----------------------------------------------|-------------|-----------|----------------|-------------|------------|----------------|-------------|------------|----------------|
| Isoferulic acid                              | 5530 ± 2788 | 7.8 ± 3.2 | 87542 ± 52916  | 4592 ± 2251 | 7.7 ± 3.2  | 79971 ± 46457  | 4618 ± 1998 | 10.9 ± 3.3 | 58885 ± 23712  |
| Isoferulic acid 3- <i>O</i> -sulfate         | 35 ± 6      | 4.7 ± 2.5 | 452 ± 87       | 49 ± 6      | 7.1 ± 3.3  | 529 ± 90       | 69 ± 15     | 6.9 ± 3.4  | 621 ± 117      |
| Isoferulic Acid 3- <i>O</i> -β-D-Glucuronide | 555 ± 120   | 3.7 ± 2.5 | 2893 ± 575     | 387 ± 95    | 3.6 ± 2.6  | 2534 ± 538     | 425 ± 130   | 1.2 ± 0.1  | 2251 ± 641     |
| Isovanillic acid                             | 231 ± 52    | 2.1 ± 0.8 | 3171 ± 596     | 220 ± 44    | 3.2 ± 0.8  | 3087 ± 558     | 235 ± 66    | 4.7 ± 2.5  | 3152 ± 562     |
| kaempferol                                   | 53 ± 14     | 1.1 ± 0.2 | 1021 ± 300     | 59 ± 18     | 1.8 ± 0.4  | 1035 ± 305     | 44 ± 14     | 1.4 ± 0.3  | 852 ± 246      |
| Kaempferol-3-glucuronide                     | 11 ± 2      | 1.9 ± 0.8 | 101 ± 9        | 13 ± 1      | 2.1 ± 0.4  | 118 ± 12       | 14 ± 2      | 2.3 ± 0.4  | 139 ± 16       |
| <i>m</i> -Coumaric acid                      | 16 ± 5      | 3.4 ± 0.9 | 183 ± 71       | 29 ± 14     | 1.2 ± 0.3  | 322 ± 150      | 16 ± 6      | 3.9 ± 2.5  | 171 ± 67       |
| <i>o</i> -Coumaric acid                      | 6 ± 1       | 2.9 ± 1.1 | 103 ± 21       | 6 ± 1       | 6.2 ± 2.4  | 99 ± 13        | 5 ± 1       | 3.8 ± 1.0  | 97 ± 15        |
| <i>p</i> -Coumaric acid                      | 71 ± 31     | 7.1 ± 3.2 | 188 ± 103      | 131 ± 51    | 7.3 ± 3.2  | 320 ± 133      | 240 ± 141   | 6.6 ± 3.3  | 530 ± 300      |
| Phenylacetic acid                            | 8110 ± 2449 | 5.7 ± 2.4 | 118624 ± 37549 | 8304 ± 1886 | 5.1 ± 2.4  | 123805 ± 28913 | 7929 ± 2021 | 4.2 ± 2.5  | 118686 ± 29004 |
| Protocatechuic acid                          | 96 ± 39     | 6.0 ± 2.4 | 1181 ± 475     | 109 ± 45    | 10.2 ± 3.5 | 1196 ± 442     | 116 ± 52    | 8.9 ± 3.0  | 1142 ± 469     |
| Pyrogallol- <i>O</i> -1-sulfate              | 202 ± 70    | 1.6 ± 0.9 | 3254 ± 1131    | 199 ± 79    | 5.1 ± 2.5  | 3393 ± 1338    | 245 ± 113   | 3.2 ± 2.6  | 4074 ± 1753    |
| Pyrogallol- <i>O</i> -2-sulfate              | 315 ± 116   | 4.2 ± 0.7 | 2428 ± 958     | 339 ± 123   | 3.8 ± 2.6  | 3007 ± 1095    | 262 ± 131   | 3.9 ± 2.6  | 2681 ± 1388    |
| Quercetin-glucuronide                        | 68 ± 16     | 6.0 ± 3.4 | 467 ± 81       | 156 ± 35    | 8.3 ± 3.9  | 910 ± 162      | 248 ± 45    | 8.9 ± 3.8  | 1420 ± 256     |
| Sinapic acid                                 | 29 ± 7      | 7.0 ± 3.3 | 287 ± 58       | 46 ± 11     | 4.1 ± 2.6  | 358 ± 84       | 64 ± 20     | 4.0 ± 2.6  | 399 ± 115      |
| Syringic acid                                | 0 ± 0       | 3.9 ± 2.5 | 0 ± 0          | 8 ± 6       | 1.3 ± 0.2  | 21 ± 20        | 9 ± 9       | 1.6 ± 0.3  | 18 ± 17        |
| <i>t</i> -Cinnamic acid                      | 98 ± 18     | 6.4 ± 2.4 | 1791 ± 363     | 123 ± 34    | 4.9 ± 2.5  | 1888 ± 399     | 90 ± 17     | 2.0 ± 0.4  | 1642 ± 355     |
| <i>t</i> -Ferulic acid                       | 25 ± 9      | 9.9 ± 3.6 | 82 ± 29        | 47 ± 12     | 6.8 ± 3.3  | 148 ± 51       | 74 ± 25     | 6.1 ± 3.4  | 190 ± 52       |
| Vanillic acid                                | 311 ± 84    | 4.1 ± 2.5 | 3586 ± 1161    | 410 ± 115   | 4.0 ± 2.5  | 3700 ± 1070    | 667 ± 223   | 3.9 ± 2.5  | 3540 ± 960     |
| Vanillic acid-4- <i>O</i> -sulfate           | 814 ± 302   | 4.3 ± 2.6 | 10775 ± 4640   | 1054 ± 274  | 4.1 ± 2.5  | 11791 ± 3372   | 1355 ± 337  | 6.4 ± 3.3  | 14072 ± 4824   |

**Supplementary Table 2.** Kinetic parameters after 1534 and 1910 mg total (poly)phenols intervention after ingestion of cranberry juice.

|                                                                 | 1534 mg      |            |                | 1910 mg     |            |                |
|-----------------------------------------------------------------|--------------|------------|----------------|-------------|------------|----------------|
|                                                                 | Cmax (nM)    | Tmax (h)   | AUC (nM*h)     | Cmax (nM)   | Tmax (h)   | AUC (nM*h)     |
| (4R)-5-(3',4'-Dihydroxyphenyl)-gamma-valerolactone-4'-O-sulfate | 430 ± 111    | 6.0 ± 2.3  | 4098 ± 930     | 683 ± 203   | 6.2 ± 2.3  | 5614 ± 1370    |
| 1-Methylpyrogallol-O-sulfate                                    | 561 ± 132    | 3.7 ± 2.5  | 5546 ± 1311    | 308 ± 63    | 6.8 ± 3.3  | 4647 ± 828     |
| 2,3-dihydroxybenzoic acid                                       | 11866 ± 3403 | 1.3 ± 0.3  | 161941 ± 43351 | 8936 ± 2516 | 1.6 ± 0.3  | 162144 ± 46199 |
| 2,4-dihydroxybenzoic acid                                       | 30 ± 7       | 1.1 ± 0.1  | 354 ± 70       | 33 ± 7      | 1.3 ± 0.3  | 367 ± 60       |
| 2,5-dihydroxybenzoic acid                                       | 834 ± 254    | 5.4 ± 1.1  | 11991 ± 3885   | 1459 ± 622  | 5.6 ± 0.8  | 19318 ± 7969   |
| 2-hydroxybenzoic acid                                           | 512 ± 266    | 2.3 ± 0.9  | 7207 ± 3838    | 628 ± 316   | 1.3 ± 0.4  | 7717 ± 4048    |
| 2-hydroxyhippuric acid                                          | 13 ± 5       | 5.8 ± 0.5  | 144 ± 61       | 202 ± 192   | 5.6 ± 0.4  | 1684 ± 1554    |
| 2-Methylpyrogallol-O-sulfate                                    | 167 ± 30     | 15.7 ± 3.3 | 2385 ± 558     | 312 ± 126   | 15.6 ± 3.4 | 4825 ± 1565    |
| 3-(4-hydroxy-3-methoxyphenyl) propionic acid                    | 217 ± 80     | 11.7 ± 3.9 | 3403 ± 1606    | 102 ± 40    | 9.6 ± 3.6  | 1605 ± 612     |
|                                                                 | 267255 ±     |            | 2708985 ±      | 390606 ±    |            | 2467256 ±      |
| 3-(4-hydroxyphenyl) propionic acid                              | 117900       | 10.6 ± 3.5 | 1049438        | 270423      | 11.0 ± 3.4 | 1001474        |
| 3,4-dihydroxybenzaldehyde                                       | 29 ± 9       | 3.6 ± 2.6  | 541 ± 187      | 29 ± 8      | 2.1 ± 0.8  | 520 ± 143      |
| 3,4-dihydroxyphenyl acetic acid                                 | 635 ± 170    | 6.0 ± 2.4  | 8707 ± 2929    | 824 ± 310   | 4.9 ± 2.5  | 13366 ± 5976   |
| 3-hydroxybenzoic acid                                           | 76 ± 22      | 3.2 ± 2.6  | 1234 ± 398     | 96 ± 31     | 1.8 ± 0.7  | 1619 ± 615     |
| 3-hydroxyhippuric acid                                          | 41 ± 7       | 1.1 ± 0.5  | 678 ± 139      | 49 ± 10     | 0.3 ± 0.2  | 872 ± 159      |
| 3-hydroxyphenyl acetic acid                                     | 333 ± 72     | 17.1 ± 3.5 | 5524 ± 1508    | 486 ± 130   | 13.4 ± 3.4 | 8898 ± 2664    |
| 4-hydroxybenzaldehyde                                           | 88 ± 20      | 6.3 ± 3.3  | 1220 ± 271     | 96 ± 23     | 6.9 ± 3.3  | 1427 ± 413     |
| 4-hydroxybenzoic acid                                           | 65 ± 18      | 7.3 ± 0.3  | 718 ± 145      | 103 ± 37    | 9.3 ± 1.9  | 1186 ± 511     |
| 4-hydroxyhippuric acid                                          | 624 ± 205    | 0.8 ± 0.3  | 7725 ± 2465    | 860 ± 288   | 0.9 ± 0.5  | 10507 ± 3414   |
| 4-hydroxyphenyl acetic acid                                     | 1702 ± 657   | 2.9 ± 0.4  | 26021 ± 9842   | 3831 ± 2588 | 2.9 ± 0.5  | 64387 ± 41410  |

|                                                      |               |            |                 |               |            |                  |
|------------------------------------------------------|---------------|------------|-----------------|---------------|------------|------------------|
| 4-Methylcatechol- <i>O</i> -sulfate                  | 4951 ± 1503   | 1.0 ± 0.0  | 76095 ± 24228   | 4067 ± 1192   | 1.0 ± 0.0  | 71307 ± 22629    |
| 4-Methylgallic-3- <i>O</i> -sulfate                  | 397 ± 113     | 4.0 ± 2.6  | 3387 ± 1074     | 472 ± 139     | 6.6 ± 3.4  | 3287 ± 988       |
| Alfa-hydroxyhippuric acid                            | 4580 ± 905    | 1.6 ± 0.6  | 41567 ± 9650    | 4991 ± 1101   | 1.4 ± 0.3  | 61145 ± 24179    |
| Benzoic acid                                         | 2327 ± 564    | 3.6 ± 2.6  | 42378 ± 10771   | 4393 ± 1986   | 1.0 ± 0.0  | 82430 ± 37764    |
| Caffeic acid                                         | 12 ± 6        | 7.7 ± 3.2  | 27 ± 12         | 8 ± 4         | 8.0 ± 3.1  | 9 ± 5            |
| Caffeic Acid 3-β-D-Glucuronide                       | 36 ± 7        | 1.4 ± 0.3  | 94 ± 25         | 45 ± 11       | 2.7 ± 0.7  | 125 ± 35         |
| Caffeic Acid 4-β-D-Glucuronide                       | 110 ± 24      | 9.4 ± 3.7  | 531 ± 97        | 119 ± 15      | 4.8 ± 2.6  | 562 ± 65         |
| Catechol- <i>O</i> -sulfate                          | 20935 ± 3471  | 6.9 ± 3.3  | 295335 ± 52160  | 22662 ± 2933  | 4.1 ± 2.5  | 323621 ± 40578   |
| Chlorogenic acid                                     | 9 ± 4         | 11.0 ± 3.4 | 63 ± 40         | 5 ± 2         | 8.3 ± 3.1  | 55 ± 43          |
| Dihydro Caffeic Acid 3- <i>O</i> -Sulfate            | 1665 ± 586    | 7.0 ± 3.3  | 14345 ± 6067    | 2181 ± 880    | 2.9 ± 0.5  | 25980 ± 10353    |
| Dihydro Caffeic Acid 3- <i>O</i> -β-D-Glucuronide    | 91 ± 11       | 6.4 ± 0.4  | 1385 ± 211      | 110 ± 13      | 6.9 ± 0.4  | 1797 ± 251       |
| Dihydro ferulic acid 4- <i>O</i> -sulfate            | 124 ± 41      | 1.0 ± 0.3  | 1771 ± 656      | 179 ± 65      | 4.6 ± 2.5  | 2533 ± 941       |
| Dihydro Ferulic Acid 4- <i>O</i> -β-D-Glucuronide    | 150 ± 23      | 7.1 ± 2.3  | 2062 ± 415      | 581 ± 469     | 9.9 ± 2.8  | 7523 ± 5927      |
| Dihydro Isoferulic acid 3- <i>O</i> -β-D-Glucuronide | 24 ± 4        | 5.9 ± 3.4  | 284 ± 52        | 69 ± 42       | 9.3 ± 3.7  | 849 ± 513        |
| dihydrocaffeic acid                                  | 97 ± 32       | 4.2 ± 2.5  | 1521 ± 464      | 188 ± 104     | 2.6 ± 0.4  | 3169 ± 1620      |
| DihydroIsoferulic acid 3- <i>O</i> -sulfate          | 112 ± 32      | 1.2 ± 0.1  | 998 ± 408       | 149 ± 35      | 2.8 ± 0.6  | 1227 ± 357       |
| Ferulic acid 4- <i>O</i> -glucuronide                | 312 ± 65      | 8.7 ± 3.8  | 1469 ± 242      | 364 ± 46      | 12.2 ± 3.7 | 1955 ± 295       |
| Ferulic Acid 4- <i>O</i> -Sulfate                    | 3711 ± 1184   | 1.3 ± 0.2  | 13938 ± 5069    | 4865 ± 1508   | 1.4 ± 0.3  | 15031 ± 4415     |
| Hippuric acid                                        | 51925 ± 15250 | 7.2 ± 3.3  | 816882 ± 244519 | 90567 ± 40359 | 8.9 ± 2.9  | 1324622 ± 469127 |
| Homovanillic acid                                    | 675 ± 230     | 19.4 ± 3.0 | 12193 ± 4341    | 1756 ± 1003   | 15.6 ± 3.4 | 28983 ± 15511    |
| Homovanillic acid sulfate                            | 38 ± 12       | 1.2 ± 0.1  | 633 ± 212       | 52 ± 15       | 1.2 ± 0.4  | 964 ± 313        |
| Isoferulic acid                                      | 4238 ± 1440   | 10.4 ± 3.5 | 54622 ± 20556   | 7545 ± 3462   | 14.4 ± 3.8 | 129174 ± 70072   |
| Isoferulic acid 3- <i>O</i> -sulfate                 | 63 ± 10       | 9.2 ± 3.8  | 564 ± 94        | 76 ± 14       | 5.6 ± 2.4  | 622 ± 87         |
| Isoferulic Acid 3- <i>O</i> -β-D-Glucuronide         | 233 ± 120     | 1.2 ± 0.1  | 1175 ± 574      | 441 ± 119     | 1.3 ± 0.3  | 3339 ± 972       |
| Isovanillic acid                                     | 232 ± 56      | 4.4 ± 2.6  | 2850 ± 519      | 340 ± 110     | 7.2 ± 3.3  | 4054 ± 1153      |

---

|                                    |             |            |                |              |            |                |
|------------------------------------|-------------|------------|----------------|--------------|------------|----------------|
| kaempferol                         | 50 ± 15     | 1.3 ± 0.2  | 973 ± 283      | 53 ± 15      | 2.1 ± 0.5  | 918 ± 294      |
| Kaempferol-3-glucuronide           | 20 ± 3      | 1.2 ± 0.2  | 145 ± 21       | 18 ± 2       | 2.4 ± 0.4  | 185 ± 30       |
| <i>m</i> -Coumaric acid            | 12 ± 4      | 2.1 ± 0.6  | 165 ± 67       | 13 ± 4       | 3.4 ± 2.6  | 187 ± 79       |
| <i>o</i> -Coumaric acid            | 6 ± 1       | 4.4 ± 0.9  | 97 ± 17        | 7 ± 1        | 2.3 ± 0.6  | 110 ± 16       |
| <i>p</i> -Coumaric acid            | 251 ± 108   | 1.8 ± 0.6  | 561 ± 245      | 364 ± 197    | 7.4 ± 3.2  | 861 ± 472      |
| Phenylacetic acid                  | 8054 ± 2116 | 4.3 ± 2.6  | 124585 ± 33830 | 10349 ± 3761 | 1.8 ± 0.4  | 141391 ± 40701 |
| Protocatechuic acid                | 92 ± 32     | 10.1 ± 3.6 | 880 ± 310      | 136 ± 60     | 11.8 ± 3.1 | 1836 ± 864     |
| Pyrogallol- <i>O</i> -1-sulfate    | 211 ± 80    | 6.9 ± 3.3  | 3348 ± 1208    | 198 ± 63     | 2.6 ± 0.7  | 3280 ± 1002    |
| Pyrogallol- <i>O</i> -2-sulfate    | 406 ± 132   | 8.0 ± 3.1  | 3192 ± 1163    | 191 ± 54     | 8.0 ± 3.1  | 1664 ± 424     |
| Quercetin-glucuronide              | 342 ± 74    | 10.9 ± 4.1 | 1841 ± 362     | 416 ± 112    | 11.7 ± 3.9 | 2150 ± 352     |
| Sinapic acid                       | 78 ± 22     | 4.1 ± 2.6  | 404 ± 96       | 104 ± 30     | 6.0 ± 3.4  | 674 ± 252      |
| Syringic acid                      | 21 ± 8      | 1.3 ± 0.2  | 49 ± 22        | 23 ± 12      | 1.4 ± 0.3  | 78 ± 42        |
| <i>t</i> -Cinnamic acid            | 96 ± 17     | 2.2 ± 0.8  | 1748 ± 344     | 116 ± 18     | 4.6 ± 2.5  | 1964 ± 382     |
| <i>t</i> -Ferulic acid             | 82 ± 27     | 9.0 ± 3.8  | 238 ± 68       | 130 ± 43     | 10.2 ± 3.5 | 682 ± 427      |
| Vanillic acid                      | 726 ± 229   | 1.0 ± 0.2  | 3891 ± 1053    | 952 ± 305    | 1.9 ± 0.6  | 6321 ± 2609    |
| Vanillic acid-4- <i>O</i> -sulfate | 1528 ± 416  | 1.1 ± 0.2  | 14800 ± 4781   | 1576 ± 368   | 1.3 ± 0.3  | 20293 ± 6818   |

---

Supplementary  
Figure 1

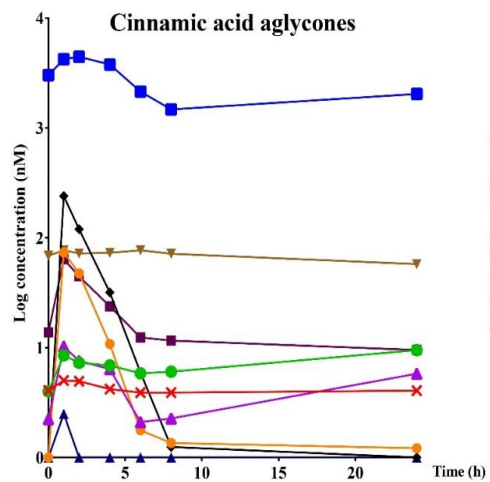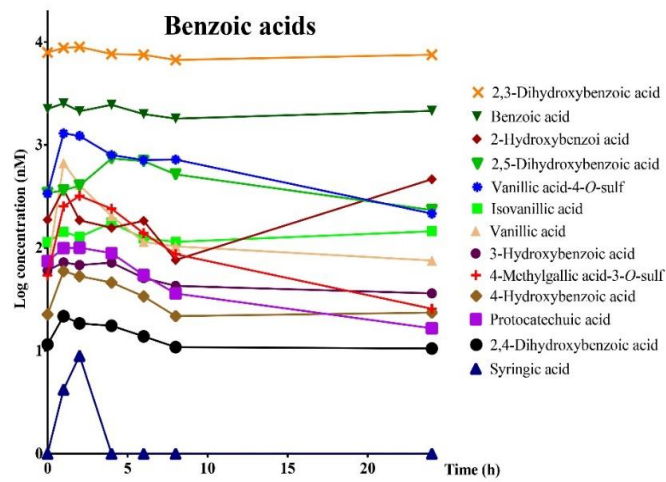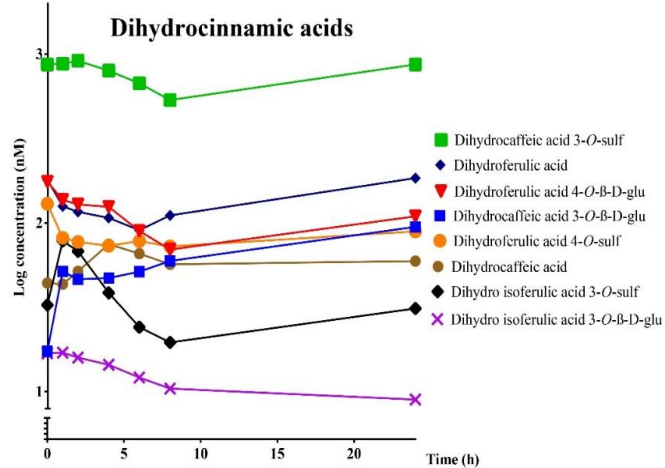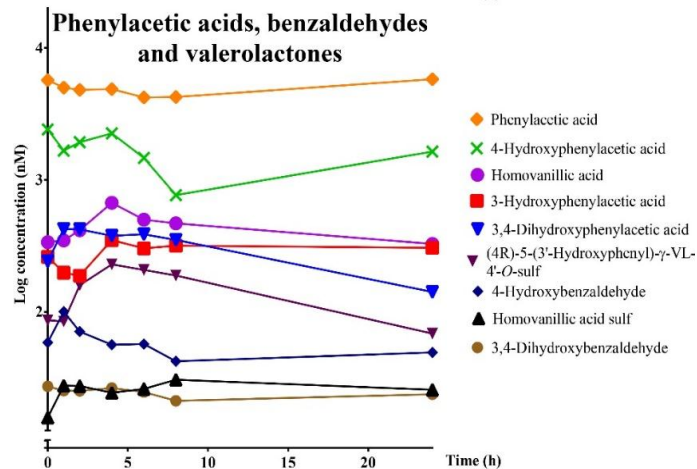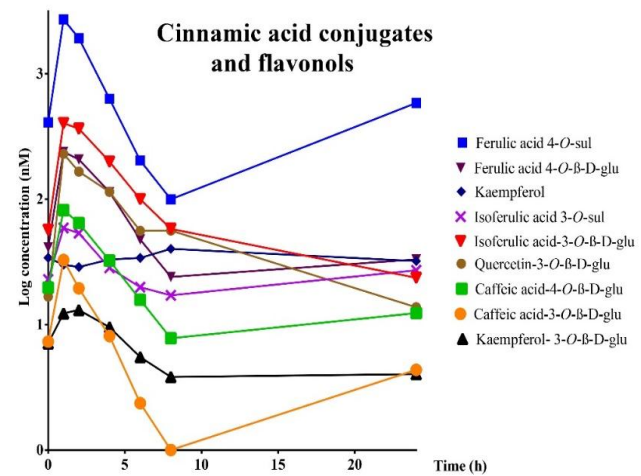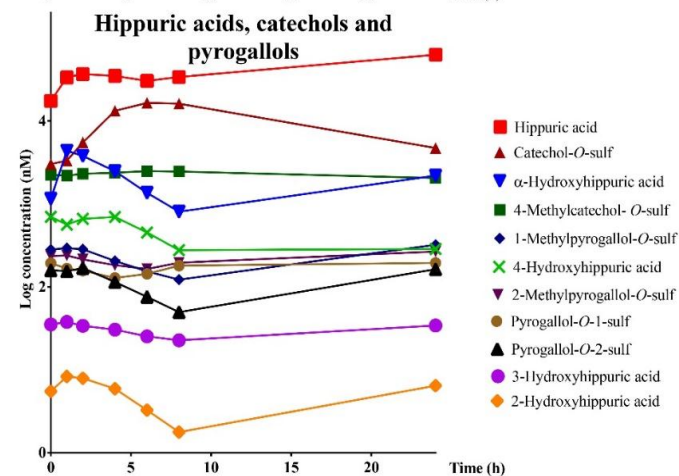

Supplement: nutrients-09-00268-s001.pdf [file nutrients-09-00268-s001.pdf]
